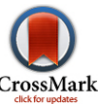

# BMP-2 Promotes Oral Squamous Carcinoma Cell Invasion by Inducing CCL5 Release

Mi-joo Kim<sup>1</sup>, Kwang-mahn Kim<sup>1</sup>, Jin Kim<sup>2\*</sup>, Kyoung-nam Kim<sup>1\*</sup>

**1** Department and Research Institute of Dental Biomaterials and Bioengineering, Dental Devices Testing & Evaluation Center, Brain Korea 21 Plus project, College of Dentistry, Yonsei University, Seoul, Republic of Korea, **2** Department of Oral Pathology, Oral Cancer Research Institute, Brain Korea 21 Plus project, College of Dentistry, Yonsei University, Seoul, Republic of Korea

## Abstract

Bone morphogenetic protein-2 (BMP-2)-containing bone grafts are useful regenerative materials for oral and maxillofacial surgery; however, several *in vitro* and *in vivo* studies previously reported cancer progression-related adverse effects caused by BMP-2. In this study, by quantifying the rhBMP-2 content released from bone grafts, the rhBMP-2 concentration that did not show cytotoxicity in each cell line was determined and applied to the *in vitro* monoculture or coculture model in the invasion assay. Our results showed that 1 ng/ml rhBMP-2, while not affecting cancer cell viability, significantly increased the invasion ability of the cancer cells cocultured with fibroblasts. Cocultured medium with rhBMP-2 also contained increased levels of matrix metalloproteinases. rhBMP-2-treated cocultured fibroblasts did not show a prominent difference in mRNA expression profile. Some cytokines, however, were detected in the conditioned medium by a human cytokine antibody array. Among them, the cancer invasion-related factor CCL5 was quantified by ELISA. Interestingly, CCL5 neutralizing antibodies significantly reduced the invasion of oral cancer cells. In conclusion, our results suggest that 1 ng/ml rhBMP-2 may induce invasion of oral squamous cell carcinoma (OSCC) cells by CCL5 release in coculture models. Therefore, we propose that a careful clinical examination before the use of rhBMP-2-containing biomaterials is indispensable for using rhBMP-2 treatment to prevent cancer progression.

**Citation:** Kim M-j, Kim K-m, Kim J, Kim K-n (2014) BMP-2 Promotes Oral Squamous Carcinoma Cell Invasion by Inducing CCL5 Release. PLoS ONE 9(10): e108170. doi:10.1371/journal.pone.0108170

**Editor:** Muy-Teck Teh, Queen Mary University of London, United Kingdom

**Received:** June 9, 2014; **Accepted:** August 21, 2014; **Published:** October 1, 2014

**Copyright:** © 2014 Kim et al. This is an open-access article distributed under the terms of the Creative Commons Attribution License, which permits unrestricted use, distribution, and reproduction in any medium, provided the original author and source are credited.

**Data Availability:** The authors confirm that all data underlying the findings are fully available without restriction. All relevant data are within the paper and its Supporting Information files.

**Funding:** This study was supported by the Dental Devices Testing & Evaluation Center, College of Dentistry, Yonsei University. The funders had no role in study design, data collection and analysis, decision to publish, or preparation of the manuscript.

**Competing Interests:** The authors have declared that no competing interests exist.

\* Email: kimkn@yuhs.ac (KNK); jink@yuhs.ac (JK)

## Introduction

Oral cancer is the sixth most common malignancy worldwide and is occurring with increasing frequency [1]. The best known risk factors of this multifactorial disease include tobacco, alcohol, betel quid chewing, genetic predisposition, the presence of potentially malignant lesions, etc. [2,3]. Inflammation caused by exogenous materials is also known to be associated with cancer initiation and development. Some biomaterials used for the recovery of human body during surgery and healing processes were shown to be irritants or oncogenes. Especially, in dentistry, it is known that dental implants for hard tissue reconstruction can be causative agents of unexpected side effects including oral cancer in some cases [4–6].

Currently, bone morphogenetic protein-2 (BMP-2) has become a popular commercial drug used for hard tissue regeneration in orthopedic surgery and dental treatment in the form of bone graft coating, membranes, or solutions. BMPs are originally identified as osteogenic cytokines that promote bone and cartilage formation *in vivo* [7,8]. BMPs regulate developmental epithelial-to-mesenchymal transition, including neural crest migration and cardiac morphogenesis [9]. However, BMP-2 overexpression has been demonstrated to result in changes in cell morphology and increased cell motility and invasiveness in the pancreatic, gastric,

prostate and breast cancer cells [10–14]. Moreover, a recent report published by the Food and Drug Administration described BMP-2-induced adverse effects such as bone resorption, local inflammation, ectopic bone formation, and cancer; specifically, 86 reports of oral and maxillofacial surgery from 2002 to 2011 were found to display negative outcomes [15]. Therefore, it is inevitable to establish methods that could accurately evaluate whether BMP-2 exogenously injected for oral hard tissue regeneration is associated with oral cancer.

The relationship between cancer cells and BMP-2 has been investigated in several studies. During clinical research, spinal surgery with high-dose rhBMP-2 treatment led to four-fold increase in the number of new malignancies after 24 months, compared to the untreated group, and the discrepancy increased after 60 months [16]. Studies analyzing 25 tongue squamous cell carcinomas by gene microarray and qPCR analyses revealed that BMP-2 gene expression may be associated with lymph node metastasis [17]. In addition, ectopic expression of BMP-2 stimulated angiogenesis in developing tumors and resulted in significantly increased local invasion and metastasis in melanoma [18,19], lung cancer cells [20,21], and breast cancer cells [22]. However, findings of these previous studies are insufficient for revealing the role of BMP-2 and its mechanism related to oral cancer progression.

The effect of fibroblasts on oral cancer progression related to BMP-2 has not yet been considered, although stromal fibroblasts are known as important and main host cell types in tumor microenvironments. Cancer-associated fibroblasts are responsible for the production of paracrine growth factors, proteolytic enzymes, and extracellular matrix (ECM) components, through which the combination of epithelial cancer cells and fibroblasts promote tumorigenesis and development of tumors that are larger than malignant epithelia alone [23]. Based on these findings, investigators should consider a combined evaluation system with regard to cancer cells and nearby stroma, especially fibroblasts, and design *in vitro* experimental models that could reflect these *in vivo* environments. For this experimental design, there were some invasion assays in the previous studies [24–26], but more natural methods that enable an easy analysis and quantification of OSCC invasion *in vitro* should be used for accurate evaluations of cancer progression.

Biological reactions in response to various irritants are different, depending on the general conditions and local status of hosts. Therefore, in this study, we assumed the situation that clinicians would not detect or disregard the signs of pre-existing oral cancer cells before BMP-2 treatment for bone-defective areas. Considering this clinical situation, we developed an *in vitro* system that combined BMP-2 and pre-existing oral cancer cells with or without fibroblasts. With the use of cancer cells either monocultured or cocultured with fibroblasts *in vitro*, we studied the effects of BMP-2 on the invasion ability of oral squamous cell carcinoma (OSCC) cell lines and analyzed the transformation and releasing factors of these cells. Our results suggest that detection of premalignant signs is important prior to BMP-2 treatment and that clinicians should recognize the possible danger of BMP-2 depending on patients' oral conditions. Furthermore, this evaluation method for regenerative materials or drugs would be useful in the development and approval process.

## Materials and Methods

### Quantification of BMP-2 extracted from bone graft materials by ELISA

Each bone graft material (2 g) described in Table S1 was incubated with 2 ml of complete protease inhibitor cocktail (Roche, Mannheim, Germany) at 4°C for 4 weeks. After extraction, samples were centrifuged at 12,000 rpm for 10 min, and the supernatants were analyzed using the BMP-2 ELISA Kit (R&D Systems, Minneapolis, MN, USA) [28,29]. This experiment was repeated independently three times under the same conditions.

### Preparation of OSCC cell lines, immortalized fibroblasts, and rhBMP-2

Two OSCC cell lines, namely, YD-10B and YD-38 (origin, human tongue and human lower gingiva, respectively), were obtained from the Korean Cell Line Bank (Seoul, Korea) and cultured as described previously before [30]. HSC-2 cells (origin, human tongue), a gift from Prof. Takashi Muramatsu, Tokyo Dental College, Japan, were maintained in DMEM: Ham's F12 (3:1; Gibco, NY, USA), supplemented with 10% FBS and 1% penicillin/streptomycin. Human immortalized fibroblasts (hTERT-hNOF), which were established previously [31], were cultured either alone or with OSCC cell lines. rhBMP-2 was purchased from the Korea Bone Bank (Seoul, Korea) and diluted in cell culture medium to various concentrations.

### Cell viability assay

Three OSCC cell lines (YD-10B, YD-38, and HSC-2) and fibroblasts ( $2 \times 10^4$  cells/well) were seeded on 24-well culture plates and cultured for 24 h. Next, cells were treated with rhBMP-2 (0, 1, 5, 10, 20, and 40 ng/ml) in serum-free medium for 24, 48, or 72 h under 5% CO<sub>2</sub>. The rhBMP-2 non-treated group was used as a control. The cell viability assay was performed using WST Solution (Daeil Lab, Seoul, Korea) according to the manufacturer's instructions, and the absorbance was measured at 450 nm by an Epoch spectrophotometer (BioTek, VT, USA). The cell viability of each experimental group was expressed as the percentage of the cell viability of the control. Three independent experiments were performed under identical conditions.

### Invasion assay

To evaluate the invasive activity of cancer cells, a modified transwell invasion assay was carried out as described previously [32]. Briefly, 24-well transwell plates (Corning, NY, USA), along with inserts containing 8- $\mu$ m pore size filters coated with collagen type I (30  $\mu$ l/well), were used. Fibroblasts ( $2 \times 10^4$  cells/well) were placed in the lower wells of chambers with 10% FBS and 1% antibiotics. After their attachment for 24 h, media for fibroblasts was replaced with serum-free one containing rhBMP-2 (1 ng/ml). And each OSCC line ( $2 \times 10^4$  cells/transwell) was seeded in the upper part (porous filter with collagen layer). OSCC monocultures were obtained by culturing OSCC cell lines without fibroblasts on the same side of filters. The rhBMP-2 non-treated group was used as a control. This condition was maintained for 48 h. OSCC cells penetrating through filters were fixed with formaldehyde (Sigma-Aldrich, MO, USA), stained with hematoxylin solution (Sigma-Aldrich), and counted under a light microscope. Experiments were repeated three times under identical conditions.

### Microarray analysis

OSCC cells (YD-38 or HSC-2) and fibroblasts ( $1.7 \times 10^5$ ) were seeded in upper and lower chambers, respectively, of 6-well transwell plates containing collagen-coated transmembrane filters (pore size, 1  $\mu$ m) (Becton, Dickinson and Company, Franklin Lakes, NJ). After cells were incubated either with or without rhBMP-2 (1 ng/ml) in serum-free medium for 48 h, total RNA was isolated from underlying fibroblasts by using Trizol Reagent (Invitrogen, Carlsbad, CA) and subjected to microarray analysis, as described in the Methods S1.

### Human matrix metalloproteinase (MMP) antibody array

Cell supernatants were obtained from the cocultures of YD-38 and fibroblasts or monocultured fibroblasts treated with or without rhBMP-2 (1 ng/ml) for 48 h and subjected to the human MMP antibody array (Ray Biotech, GA, USA). The relative expression levels of released MMPs and tissue inhibitors of metalloproteinases (TIMPs) were calculated by comparing their levels before and after rhBMP-2 treatment.

### Measurement of secreted cytokines by the human cytokine antibody assay and ELISA

YD-38 cells cocultured with fibroblasts in 24-well transwell plates were treated with or without rhBMP-2 (1 ng/ml) for 48 h, and the supernatants were then subjected to the human cytokine antibody array (Ray Biotech, GA, USA). The relative expression level of cytokines was determined by comparing signal intensities.

Monoculture supernatants were obtained by culturing OSCC cell lines or fibroblasts on the same side of filters as described in the coculture design. Cells were cultured for 48 h with either 1 ng/ml

rhBMP-2-containing medium or pure serum-free medium. The CCL5 levels in supernatants obtained from monoculture or coculture models were quantified using the Human CCL5 ELISA Kit (R&D Systems, MN, USA). Experiments were performed three times under identical conditions.

### Treatment of coculture models with CCL5 neutralizing antibodies and rhBMP-2 and invasion assay

CCL5 neutralizing antibodies (R&D Systems, MN, USA), along with rhBMP-2, were added to coculture models in 24-well transwell plates coated with collagen type I (50  $\mu$ l/well) for 48 h. Control group was set as the one with rhBMP-2 (1 ng/ml) and IgG antibody. Three treatment groups were as follows: control, rhBMP-2 (1 ng/ml) plus CCL5 neutralizing antibody (0.01  $\mu$ g/ml), and rhBMP-2 (1 ng/ml) plus CCL5 neutralizing antibody (0.05  $\mu$ g/ml). Finally, invading cells were fixed, stained, and counted as described before.

### Statistical analysis

Statistical comparisons were performed by the two-sample *t* test. Data were given as means  $\pm$  standard deviations in graphs. Significance was established when  $P < 0.05$ .

## Results

### BMP-2 content in bone graft materials

As shown in Table S1, the synthetic rhBMP-2-coated product BMP (Cowellmedi, Korea) released the highest amount of BMP-2. The BMP-2 content in the allografts, xenografts, and synthetic grafts varied and did not depend on the type of bone grafts. The average concentration of rhBMP-2 extracted from all graft materials was 1047 pg/ml.

### rhBMP-2 (1 ng/ml) has no significant effect on the cell viability of three OSCC cell lines and fibroblasts

While the cell viability of three OSCC cell lines and fibroblasts was decreased by rhBMP-2 in a concentration-dependent manner (0–40 ng/ml; Fig. 1), 1 ng/ml rhBMP-2 did not reduce cell viability, except in case of YD-10B that were treated for 72 h. Notably, in contrast to YD-10B and fibroblasts, the viability of YD-38 and HSC-2 cells increased at all concentrations after 48 and 72 h of treatment. Since 1 ng/ml rhBMP-2 had no significant effects on the cell viability of three OSCC cell lines and fibroblasts after 24 and 72 h and the average rhBMP-2 concentration extracted from graft materials was 1047 pg/ml, rhBMP-2 at the concentration of 1 ng/ml was used in subsequent experiments.

### rhBMP-2 promotes cell invasion of three OSCC cell lines

The schematic diagram of the invasion assay is shown in Fig. 2a. Monocultured OSCC cell lines did not invade through collagen membranes, regardless of rhBMP-2 treatment (Fig. 2h, all mean values were lower than 10). In contrast, YD-10B, YD-38, and HSC-2 cocultured with fibroblasts invaded to the bottom surface of collagen-coated transwell plates at significantly higher levels without FBS (Fig. 2h). Especially, upon rhBMP-2 treatment, cocultured YD-38 proliferated into clusters and showed the highest number of invading cells among all groups (mean; 466) (Fig. 2d vs. 2e).

### rhBMP-2 causes little genetic changes in cocultured fibroblasts

The fibroblasts cocultured with YD-38 or HSC-2 were treated with 1 ng/ml rhBMP-2, and genome-wide gene expression

profiles of the fibroblasts were then analyzed by the microarray analysis. Significant genetic changes were only detected in the FAM21A gene (fold change,  $\sim 2.2$ ;  $P < 0.05$ ; Table S2). Alterations with over 1.5-fold changes were also summarized in Table S2.

### rhBMP-2 increases MMP release in coculture models

The release of MMPs from monocultured fibroblasts was found to be decreased by treatment with 1 ng/ml rhBMP-2 when compared with the non-treated control (Fig. S1). However, the coculture supernatant of YD-38 and fibroblasts showed increased levels of all MMPs, especially MMP-10, MMP-13, and TIMP-1, after rhBMP-2 treatment, compared to the non-treated control (Fig. 3a–c).

### Treatment of cocultured OSCC models with rhBMP-2 significantly increases CCL5 release

The human cytokine array analysis indicates that the fibroblasts cocultured with YD-38 and treated with 1 ng/ml rhBMP-2 showed decreases in the release of most cytokines, except CCL5, CXCL12, CCL17, VEGF, and PDGF (Fig. 3f). The level of CCL5, in particular, was markedly increased in intensity from 230 to 337 (Fig. 3d–f, in the red box). Since CCL5 was previously shown to be a representative protein related to cancer invasion [33–36], we considered that CCL5 may be a key factor in oral cancer invasion upon rhBMP-2 treatment.

The release of human CCL5 proteins was further validated by ELISA (Fig. 4). In the coculture groups (YD10B-F, YD38-F, and HSC2-F), treatment with 1 ng/ml rhBMP-2 resulted in significant increase in CCL5 release ( $P < 0.05$ ); in contrast, monocultured OSCC cell lines or fibroblasts showed either reduced or unchanged levels of CCL5 release after rhBMP-2 treatment.

### CCL5 neutralizing antibodies inhibit OSCC cell invasion induced by rhBMP-2

As shown in Fig. 2, rhBMP-2 (1 ng/ml) treatment led to significant increases in cell invasion of three OSCC cell lines; however, the number of OSCC cells penetrating through 50  $\mu$ l of collagen type I were less than those penetrating through 30  $\mu$ l of collagen (Fig. 5). As shown in Fig. 5g, 0.01  $\mu$ g/ml of CCL5 neutralizing antibodies reduced the amount of invading cells in every group, compared to the control (YD-10B; 73 to 69, YD-38; 243 to 153, HSC-2; 162 to 116). In particular, in YD-10B and YD-38 cells, the effect of CCL5 neutralizing antibodies was notably greater at the concentration of 0.05  $\mu$ g/ml than at 0.01  $\mu$ g/ml.

## Discussion

Multiple microenvironmental alterations occur during cancer progression; these changes include increased numbers of fibroblasts, blood vessels, immune cells, and ECM components. The crosstalk between normal fibroblasts and cancer-associated fibroblasts and epithelial cells is also known to contribute to cancer progression. Thus, there are modifications of normal fibroblasts to cancer fibroblasts and remodeling of ECM by degradation and increased stiffness. The coculture condition used in this study has an advantage for evaluating cell-to-cell interactions in cancer microenvironments, as well as the contribution of stromal fibroblasts to cancer cells. We believe that such an *in vitro* model (cocultures of OSCC cell lines and fibroblasts) mimics the *in vivo* system and can therefore be a critical and powerful tool. In a previous study, cocultures of breast carcinoma cell lines with fibroblastic stromal cells resulted in marked induction of aromatase enzymatic activity and mRNA expression [37], both of which

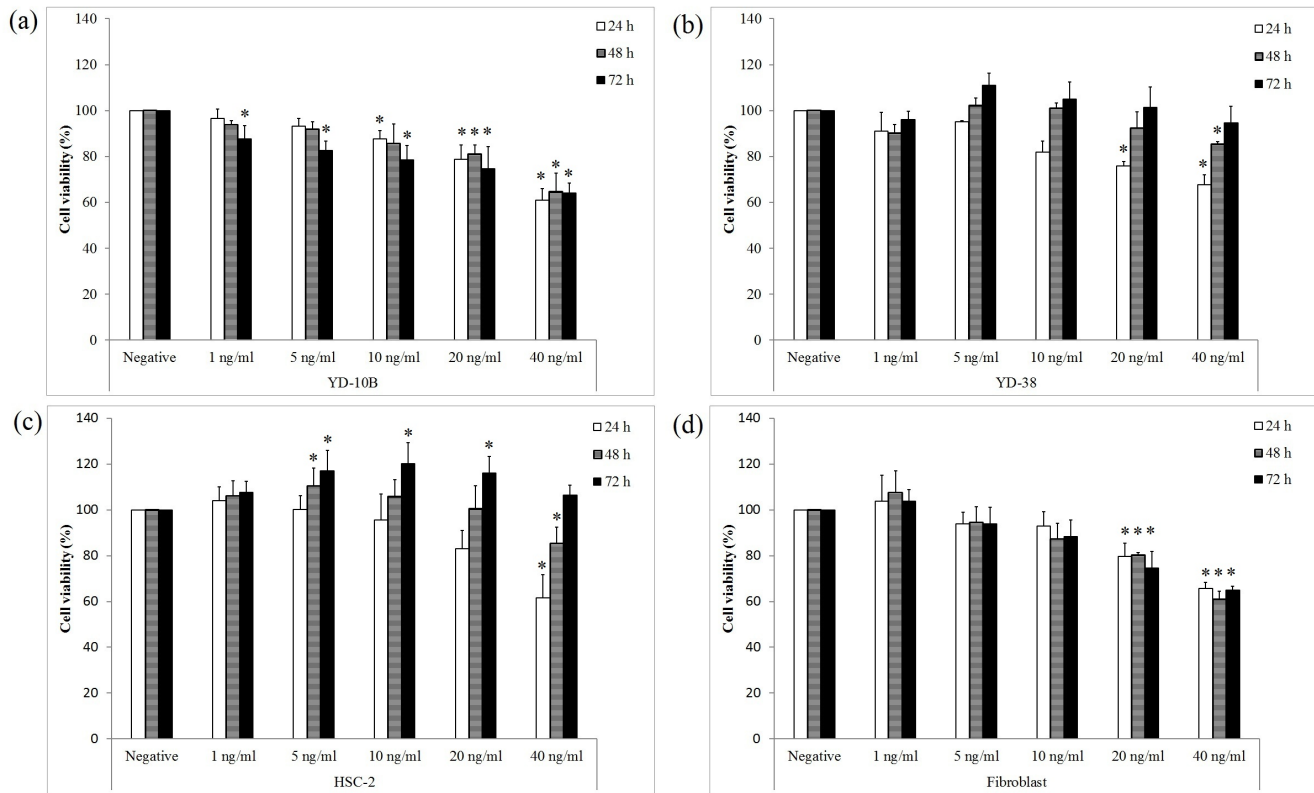

**Figure 1. Cell viability of three OSCC cell lines and fibroblasts.** Data are expressed as the percentage of respective non-treated control groups. Data shown are means of three independent repeats, and error bars indicate standard deviation. \*P<0.05 compared to the negative control. doi:10.1371/journal.pone.0108170.g001

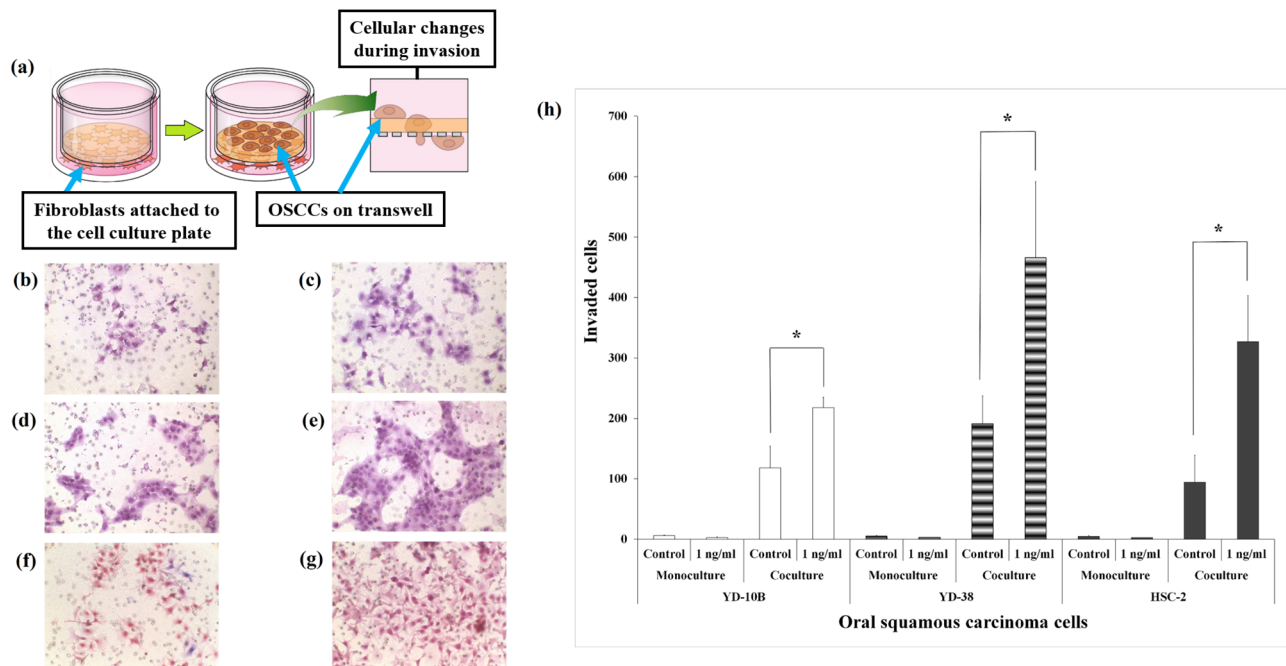

**Figure 2. Invasion assay in monoculture or coculture models.** (a) Schematic diagram of the invasion assay and cellular changes. Carcinoma cells on the transwell penetrate the collagen membrane when cocultured with fibroblasts and then finally attach to the lower surface of the transwell. (b–g) Cocultured YD-10B (b and c), YD-38 (d and e), and HSC-2 (f and g) cells either untreated (b, d, and f) or treated with 1 ng/ml rhBMP-2 (c, e, and g). (h) Quantification of the invasion ability of OSCC cells. Data shown are means of three independent repeats, and error bars indicate standard deviation. \*P<0.05 compared to the control. doi:10.1371/journal.pone.0108170.g002





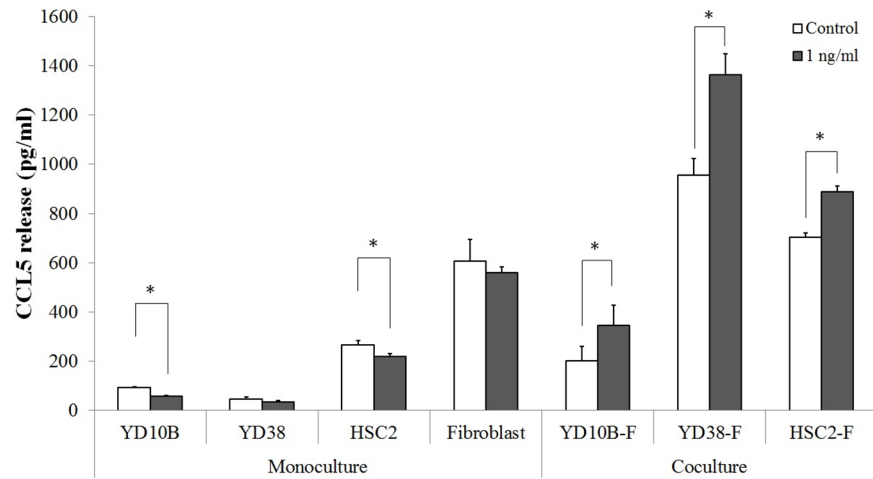

**Figure 4. Human CCL5 ELISA of monocultured or cocultured medium with or without 1 ng/ml rhBMP-2.** Data shown are means of three independent repeats, and error bars indicate standard deviation. \* $P < 0.05$  compared to the control. doi:10.1371/journal.pone.0108170.g004

cancer cell-derived TGF- $\beta$ 1 was responsible for inducing trans-differentiation of oral normal fibroblasts into cancer associated fibroblasts (CAF)-like cells and CAF-like cells secrete high levels of growth factors that enhance OSCC cell line invasion and proliferation [42]. Therefore, the existence of fibroblasts and its stimulation have a key role in increased invasion ability of OSCC cell lines by rhBMP-2 in this study.

Increased OSCC cell invasion occurred concurrently with the increased levels of matrix metalloproteinases (MMPs) and their endogenous inhibitors, namely, tissue inhibitors of metalloproteinase (TIMPs). It was already known that increased expression of certain MMPs plays a significant role in ECM degradation, disrupts cell-cell contact through E-cadherin [43], and therefore correlates with tumor invasion [44]. Among the upregulated MMPs shown in Fig. 3, MMP-10 has been suggested to play an important role in the invasion and metastasis of head and neck cancer [45], and MMP-13 is known as a commonly upregulated

gene by cancer invasion-related factors, thereby promoting tumor angiogenesis [46]. TIMP-1 is frequently overexpressed in several types of human cancers and serves as a prognostic marker [47,48]. Taken together, our data support that rhBMP-2 increases the invasion ability of cancer cells.

CCL5 level increased markedly after the treatment of 1 ng/ml rhBMP-2 in the YD-38 coculture model. Since this cytokine has been previously suggested to be a factor related to cancer cell invasion, we next investigated the role of CCL5 in the cancer cell invasion assay. In Fig. 5, YD-10B, YD-38, and HSC-2 coculture models that were treated with both rhBMP-2 and CCL5 antibodies had less invading cells, compared to those treated with rhBMP-2 alone ( $P < 0.05$ ), and that the inhibitory effects were dependent on the concentration of the neutralizing antibodies. These data clearly suggest that interfering with CCL5 signaling by using specific neutralizing antibodies may be an attractive approach to offer protection against OSCC cell invasion. The

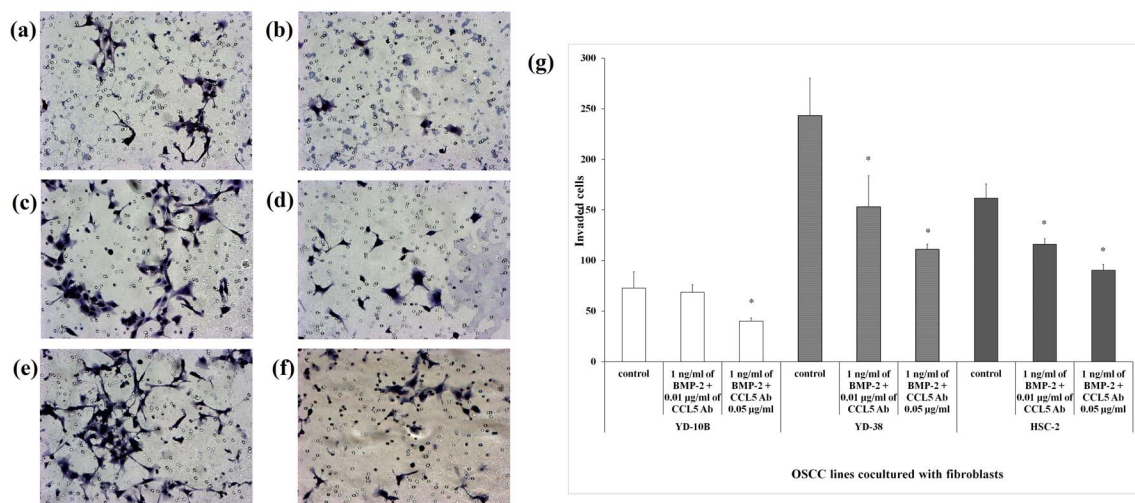

**Figure 5. Invasion assay of coculture models treated with rhBMP-2 and CCL5 neutralizing antibodies.** (a–f) Representative invasion results of YD-10B (a and b), YD-38 (c and d), and HSC-2 (e and f) cocultured cells treated with either 1 ng/ml rhBMP-2 only (a, c, and e) or both rhBMP-2 and 0.05  $\mu$ g/ml CCL5 neutralizing antibodies (b, d, and f). (g) Quantification of the invasion ability of OSCC cell lines. Data shown are means of three independent repeats, and error bars indicate standard deviation. \* $P < 0.05$  compared to the control. doi:10.1371/journal.pone.0108170.g005

investigation by Salo S et al. also showed such results in human squamous cell carcinoma originated from tongue, in which CCL5 function-blocking monoclonal antibody inhibited the invasion bone marrow-derived multipotent mesenchymal stromal cells (BMMSCs)-promoted HSC-3 cell invasion area [27]. Similar results have also been shown in colorectal cancer, breast cancer, and prostate cancer [49–51]. However, noticeably, interfering with CCL5 signaling did not completely inhibit rhBMP-2-induced cell invasion, implicating the involvement of other pathways. For instance, CXCL9 [51], CXCL12 [52], PDGF-BB [53], and VEGF [54], all of which are well-known factors associated with cancer cell invasion, were also detected by the cytokine antibody array in this study. Future studies will be necessary to determine whether combined blockage of these proteins will provide protection against BMP-2-induced oral cancer progression.

Based on the invasion assay, the cocultured OSCC cell lines treated with rhBMP-2 were found to exhibit more invasive characteristics *in vitro* than the monocultured ones. However, the fibroblasts cocultured with YD-38 or HSC-2 demonstrated no common genetic alterations with over 2-fold changes. Although one common gene, RN7SK, was found to be downregulated (fold change, ~1.5) in Table S2, its expression was comparatively weak. A better understanding of the relationship of RN7SK with cytokines and cancer cell invasion will be necessary for elucidating its correlation with rhBMP-2 and cancer invasion.

Despite these limitations, our study discusses the probability of unconsidered adverse effects caused by 1 ng/ml rhBMP-2 and warns rhBMP-2-induced invasion and progression of pre-existing cancer cells that might not be detected in a diagnostic process. In addition, this study also emphasizes the importance of the *in vitro* coculture system (cancer cells with fibroblasts) for the evaluation of cancer progression induced by regenerative biomaterials. However, it is too early to conclude that rhBMP-2 is a carcinogenic material at specific concentrations because many previous studies

evaluated the effects of rhBMP-2 *in vivo*. Therefore, generation of an appropriate animal model for the application of rhBMP-2 is additionally necessary in a further study. In conclusion, considering the chances of negative effects with oral usage of rhBMP-2, close examination and thorough diagnosis of cancers are indispensable before the use of rhBMP-2. Additionally, malignant tissues near the defective areas should be treated or removed in advance to eliminate the possibility of adverse effects caused by rhBMP-2.

## Supporting Information

**Figure S1 MMP array analysis with or without 1 ng/ml rhBMP-2 treatment.** Monocultured fibroblasts either untreated (a) or treated with rhBMP-2 (b). (c) Quantification of the levels of various MMPs.

(JPG)

**Table S1 rhBMP-2 content in bone grafts.**

(JPG)

**Table S2 Genetic changes of fibroblast cocultured with YD-38 (a) or HSC-2 (b) after rhBMP-2 treatment by microarray assay.**

(JPG)

**Methods S1 Microarray analysis.**

(DOC)

## Author Contributions

Conceived and designed the experiments: MJK KMK JK KNK. Performed the experiments: MJK. Analyzed the data: MJK KMK JK KNK. Contributed reagents/materials/analysis tools: MJK KMK JK KNK. Contributed to the writing of the manuscript: MJK KMK JK KNK.

## References

- Parkin DM, Bray F, Ferlay J, Pisani P (2005) Global cancer statistics, 2002. *CA Cancer J Clin* 55: 74–108.
- Jemal A, Bray F, Center MM, Ferlay J, Ward E, et al. (2011) Global cancer statistics. *CA Cancer J Clin* 61: 69–90.
- Brzak BL, Mravak-Stipetic M, Canjuga I, Baricevic M, Balicevic D, et al. (2012) The frequency and malignant transformation rate of oral lichen planus and leukoplakia—a retrospective study. *Coll Antropol* 36: 773–777.
- Siddiqi A, Payne AG, De Silva RK, Duncan WJ (2011) Titanium allergy: could it affect dental implant integration? *Clin Oral Implants Res* 22: 673–680.
- Pfammatter C, Lindenmuller IH, Lugli A, Filippi A, Kuhl S (2012) Metastases and primary tumors around dental implants: A literature review and case report of peri-implant pulmonary metastasis. *Quintessence Int* 43: 563–570.
- Alvim-Pereira F, Montes CC, Mira MT, Trevilatto PC (2008) Genetic susceptibility to dental implant failure: a critical review. *Int J Oral Maxillofac Implants* 23: 409–416.
- Lopez-Morales Y, Abarrategi A, Ramos V, Moreno-Vicente C, Lopez-Duran L, et al. (2010) *In vivo* comparison of the effects of rhBMP-2 and rhBMP-4 in osteochondral tissue regeneration. *Eur Cell Mater* 20: 367–378.
- Kisiel M, Ventura M, Oommen OP, George A, Walboomers XF, et al. (2012) Critical assessment of rhBMP-2 mediated bone induction: an *in vitro* and *in vivo* evaluation. *J Control Release* 162: 646–653.
- Thiery JP, Sleeman JP (2006) Complex networks orchestrate epithelial-mesenchymal transitions. *Nat Rev Mol Cell Biol* 7: 131–142.
- Jin H, Pi J, Huang X, Huang F, Shao W, et al. (2012) BMP2 promotes migration and invasion of breast cancer cells via cytoskeletal reorganization and adhesion decrease: an AFM investigation. *Appl Microbiol Biotechnol* 93: 1715–1723.
- Clement JH, Raida M, Sanger J, Bicknell R, Liu J, et al. (2005) Bone morphogenetic protein 2 (BMP-2) induces *in vitro* invasion and *in vivo* hormone independent growth of breast carcinoma cells. *Int J Oncol* 27: 401–407.
- Liu J, Ben QW, Yao WY, Zhang JJ, Chen DF, et al. (2012) BMP2 Induces PANC-1 cell invasion by MMP-2 overexpression through ROS and ERK. *Frontiers in Bioscience-Landmark* 17: 2541–2549.
- Park Y, Kang MH, Seo HY, Park JM, Choi CW, et al. (2010) Bone morphogenetic protein-2 levels are elevated in the patients with gastric cancer and correlate with disease progression. *Med Oncol* 27: 1192–1199.
- Feeley BT, Gamradt SC, Hsu WK, Liu N, Krenk L, et al. (2005) Influence of BMPs on the formation of osteoblastic lesions in metastatic prostate cancer. *J Bone Miner Res* 20: 2189–2199.
- Woo EJ (2012) Recombinant human bone morphogenetic protein-2: adverse events reported to the Manufacturer and User Facility Device Experience database. *Spine J* 12: 894–899.
- Carragee EJ, Hurwitz EL, Weiner BK (2011) A critical review of recombinant human bone morphogenetic protein-2 trials in spinal surgery: emerging safety concerns and lessons learned. *Spine J* 11: 471–491.
- Zhou X, Temam S, Oh M, Pungpravat N, Huang BL, et al. (2006) Global expression-based classification of lymph node metastasis and extracapsular spread of oral tongue squamous cell carcinoma. *Neoplasia* 8: 925–932.
- Rothhammer T, Poser I, Soncin F, Bataille F, Moser M, et al. (2005) Bone morphogenetic proteins are overexpressed in malignant melanoma and promote cell invasion and migration. *Cancer Res* 65: 448–456.
- Braig S, Rothhammer T, Bosserhoff AK (2009) Bone morphogenetic proteins induce expression of matrix metalloproteinases in melanoma cells and surrounding fibroblasts. *Experimental Dermatology* 18: 312–312.
- Langenfeld EM, Calvano SE, Abou-Nukta F, Lowry SF, Amenta P, et al. (2003) The mature bone morphogenetic protein-2 is aberrantly expressed in non-small cell lung carcinomas and stimulates tumor growth of A549 cells. *Carcinogenesis* 24: 1445–1454.
- Langenfeld EM, Langenfeld J (2004) Bone Morphogenetic Protein-2 stimulates angiogenesis in developing tumors. *Molecular Cancer Research* 2: 141–149.
- Katsuno Y, Hanyu A, Kanda H, Ishikawa Y, Akiyama F, et al. (2008) Bone morphogenetic protein signaling enhances invasion and bone metastasis of breast cancer cells through Smad pathway. *Oncogene* 27: 6322–6333.
- Salo T, Vered M, Bello IO, Nyberg P, Bitu CC, et al. (2014) Insights into the role of components of the tumor microenvironment in oral carcinoma call for new therapeutic approaches. *Exp Cell Res* 325: 58–64.
- Karnoub AE, Dash AB, Vo AP, Sullivan A, Brooks MW, et al. (2007) Mesenchymal stem cells within tumour stroma promote breast cancer metastasis. *Nature* 449: 557–U554.
- Skowronki K, Andrews J, Rodenhiser DI, Coomber BL (2014) Genome-Wide Analysis in Human Colorectal Cancer Cells Reveals Ischemia-Mediated

- Expression of Motility Genes via DNA Hypomethylation. *PLoS One* 9: e103243.
26. Kroiss A, Vincent S, Decaussin-Petrucci M, Meugnier E, Viallet J, et al. (2014) Androgen-regulated microRNA-135a decreases prostate cancer cell migration and invasion through downregulating ROCK1 and ROCK2. *Oncogene*.
  27. Salo S, Bitu C, Merkku K, Nyberg P, Bello IO, et al. (2013) Human bone marrow mesenchymal stem cells induce collagen production and tongue cancer invasion. *PLoS One* 8: e77692.
  28. Shigeyama Y, Derrico JA, Stone R, Somerman MJ (1995) Commercially-Prepared Allograft Material Has Biological-Activity in-Vitro. *Journal of Periodontology* 66: 478–487.
  29. Wildemann B, Kadow-Romacker A, Pruss A, Haas NP, Schmidmaier G (2007) Quantification of growth factors in allogenic bone grafts extracted with three different methods. *Cell Tissue Bank* 8: 107–114.
  30. Che ZM, Jung TH, Choi JH, Yoon do J, Jeong HJ, et al. (2006) Collagen-based co-culture for invasive study on cancer cells-fibroblasts interaction. *Biochem Biophys Res Commun* 346: 268–275.
  31. Illeperuma RP, Park YJ, Kim JM, Bae JY, Che ZM, et al. (2012) Immortalized gingival fibroblasts as a cytotoxicity test model for dental materials. *J Mater Sci Mater Med* 23: 753–762.
  32. Youngs SJ, Ali SA, Taub DD, Rees RC (1997) Chemokines induce migrational responses in human breast carcinoma cell lines. *Int J Cancer* 71: 257–266.
  33. Borsig L, Wolf MJ, Roblek M, Lorentzen A, Heikenwalder M (2013) Inflammatory chemokines and metastasis-tracing the accessory. *Oncogene*.
  34. Kato T, Fujita Y, Nakane K, Mizutani K, Terazawa R, et al. (2013) CCR1/CCL5 interaction promotes invasion of taxane-resistant PC3 prostate cancer cells by increasing secretion of MMPs 2/9 and by activating ERK and Rac signaling. *Cytokine*.
  35. Long H, Xie R, Xiang T, Zhao Z, Lin S, et al. (2012) Autocrine CCL5 signaling promotes invasion and migration of CD133+ ovarian cancer stem-like cells via NF-kappaB-mediated MMP-9 upregulation. *Stem Cells* 30: 2309–2319.
  36. Soria G, Ofri-Shahak M, Haas I, Yaal-Hahoshen N, Leider-Trejo L, et al. (2011) Inflammatory mediators in breast cancer: coordinated expression of TNFalpha & IL-1beta with CCL2 & CCL5 and effects on epithelial-to-mesenchymal transition. *BMC Cancer* 11: 130.
  37. Miki Y, Suzuki T, Tazawa C, Yamaguchi Y, Kitada K, et al. (2007) Aromatase localization in human breast cancer tissues: possible interactions between intratumoral stromal and parenchymal cells. *Cancer Res* 67: 3945–3954.
  38. Ye S, Park BH, Song KJ, Kim JR, Jang KY, et al. (2013) In vivo inhibition of bone morphogenetic protein-2 on breast cancer cell growth. *Spine (Phila Pa 1976)* 38: E143–150.
  39. Zhang J, Ge Y, Sun L, Cao J, Wu Q, et al. (2012) Effect of bone morphogenetic protein-2 on proliferation and apoptosis of gastric cancer cells. *Int J Med Sci* 9: 184–192.
  40. Finkenzeller G, Hager S, Stark GB (2012) Effects of bone morphogenetic protein 2 on human umbilical vein endothelial cells. *Microvasc Res* 84: 81–85.
  41. Kokorina NA, Zakharkin SO, Krebsbach PH, Nussenbaum B (2011) Treatment effects of rhBMP-2 on invasiveness of oral carcinoma cell lines. *Laryngoscope* 121: 1876–1880.
  42. Kellermann MG, Sobral LM, da Silva SD, Zecchin KG, Graner E, et al. (2008) Mutual paracrine effects of oral squamous cell carcinoma cells and normal oral fibroblasts: induction of fibroblast to myofibroblast transdifferentiation and modulation of tumor cell proliferation. *Oral Oncol* 44: 509–517.
  43. Zheng G, Lyons JG, Tan TK, Wang Y, Hsu TT, et al. (2009) Disruption of E-cadherin by matrix metalloproteinase directly mediates epithelial-mesenchymal transition downstream of transforming growth factor-beta1 in renal tubular epithelial cells. *Am J Pathol* 175: 580–591.
  44. Jordan RC, Macabeo-Ong M, Shiboski CH, Dekker N, Ginzinger DG, et al. (2004) Overexpression of matrix metalloproteinase-1 and -9 mRNA is associated with progression of oral dysplasia to cancer. *Clin Cancer Res* 10: 6460–6465.
  45. Deraz EM, Kudo Y, Yoshida M, Obayashi M, Tsunematsu T, et al. (2011) MMP-10/stromelysin-2 promotes invasion of head and neck cancer. *PLoS One* 6: e25438.
  46. Kudo Y, Iizuka S, Yoshida M, Tsunematsu T, Kondo T, et al. (2012) Matrix metalloproteinase-13 (MMP-13) directly and indirectly promotes tumor angiogenesis. *J Biol Chem* 287: 38716–38728.
  47. Jung YS, Liu XW, Chirco R, Warner RB, Fridman R, et al. (2012) TIMP-1 induces an EMT-like phenotypic conversion in MDCK cells independent of its MMP-inhibitory domain. *PLoS One* 7: e38773.
  48. Wurtz SO, Schroh AS, Mouridsen H, Brunner N (2008) TIMP-1 as a tumor marker in breast cancer - An update. *Acta Oncologica* 47: 580–590.
  49. Cambien B, Richard-Fiardo P, Karimjee BF, Martini V, Ferrua B, et al. (2011) CCL5 neutralization restricts cancer growth and potentiates the targeting of PDGFRbeta in colorectal carcinoma. *PLoS One* 6: e28842.
  50. Velasco-Velazquez M, Pestell RG (2013) The CCL5/CCR5 axis promotes metastasis in basal breast cancer. *Oncoimmunology* 2: e23660.
  51. Chang KP, Wu CC, Fang KH, Tsai CY, Chang YL, et al. (2013) Serum levels of chemokine (C-X-C motif) ligand 9 (CXCL9) are associated with tumor progression and treatment outcome in patients with oral cavity squamous cell carcinoma. *Oral Oncol* 49: 802–807.
  52. Onoue T, Uchida D, Begum NM, Tomizuka Y, Yoshida H, et al. (2006) Epithelial-mesenchymal transition induced by the stromal cell-derived factor-1/CXCR4 system in oral squamous cell carcinoma cells. *Int J Oncol* 29: 1133–1138.
  53. Sun X, Gao X, Zhou L, Sun L, Lu C (2013) PDGF-BB-induced MT1-MMP expression regulates proliferation and invasion of mesenchymal stem cells in 3-dimensional collagen via MEK/ERK1/2 and PI3K/AKT signaling. *Cell Signal* 25: 1279–1287.
  54. Kapoor P, Deshmukh R (2012) VEGF: A critical driver for angiogenesis and subsequent tumor growth: An IHC study. *J Oral Maxillofac Pathol* 16: 330–337.
